# Supplementary material for: Hippocampal Neurogenesis Is Enhanced in Adult Tau Deficient Mice
Source: Cells. 2020 Jan 14;9(1):210. doi: 10.3390/cells9010210 (PMC7016791; doi:10.3390/cells9010210)
Supplement: Supplementary file 1 [file cells-09-00210-s001.pdf]

## Supplemental Data

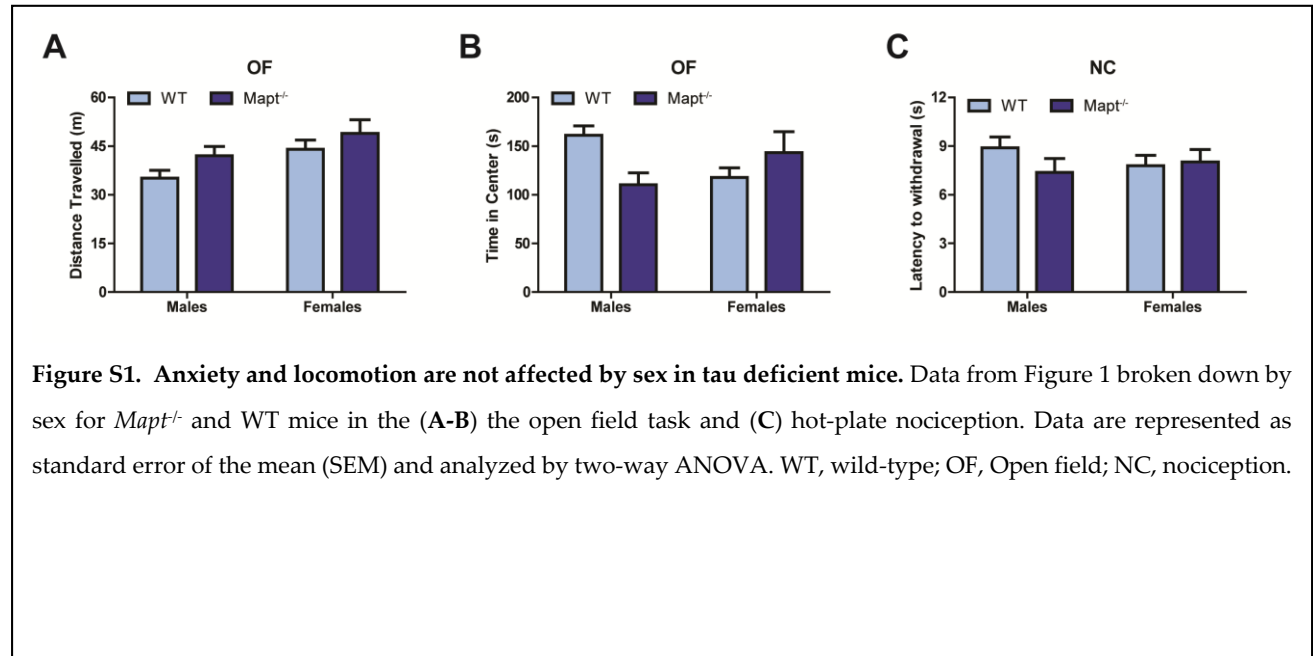

**Figure S1. Anxiety and locomotion are not affected by sex in tau deficient mice.** Data from Figure 1 broken down by sex for *Mapt*<sup>-/-</sup> and WT mice in the (A-B) the open field task and (C) hot-plate nociception. Data are represented as standard error of the mean (SEM) and analyzed by two-way ANOVA. WT, wild-type; OF, Open field; NC, nociception.

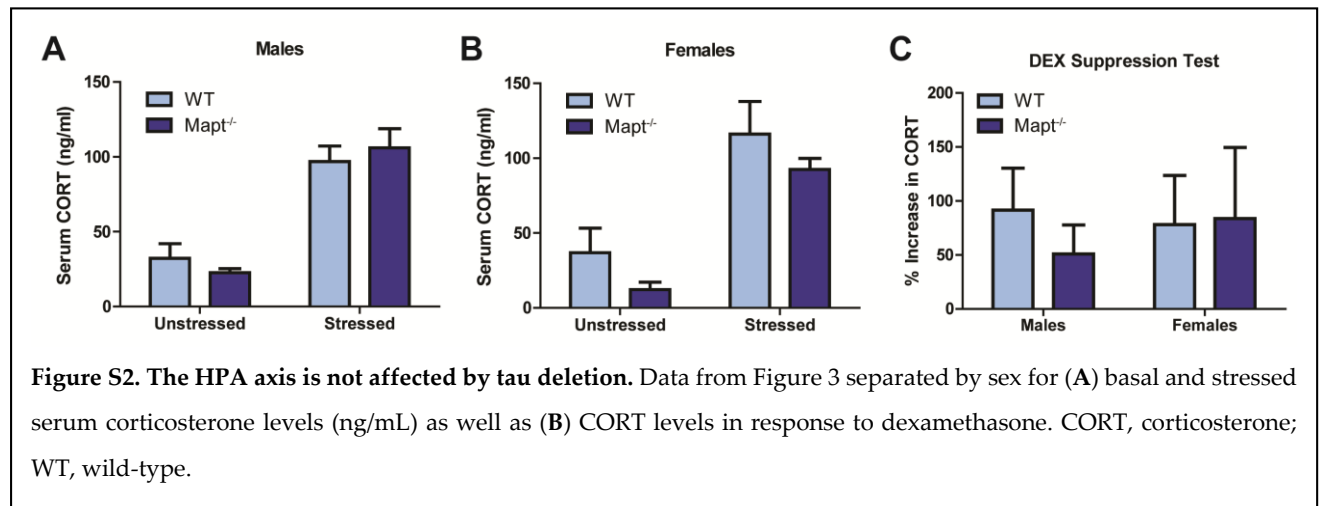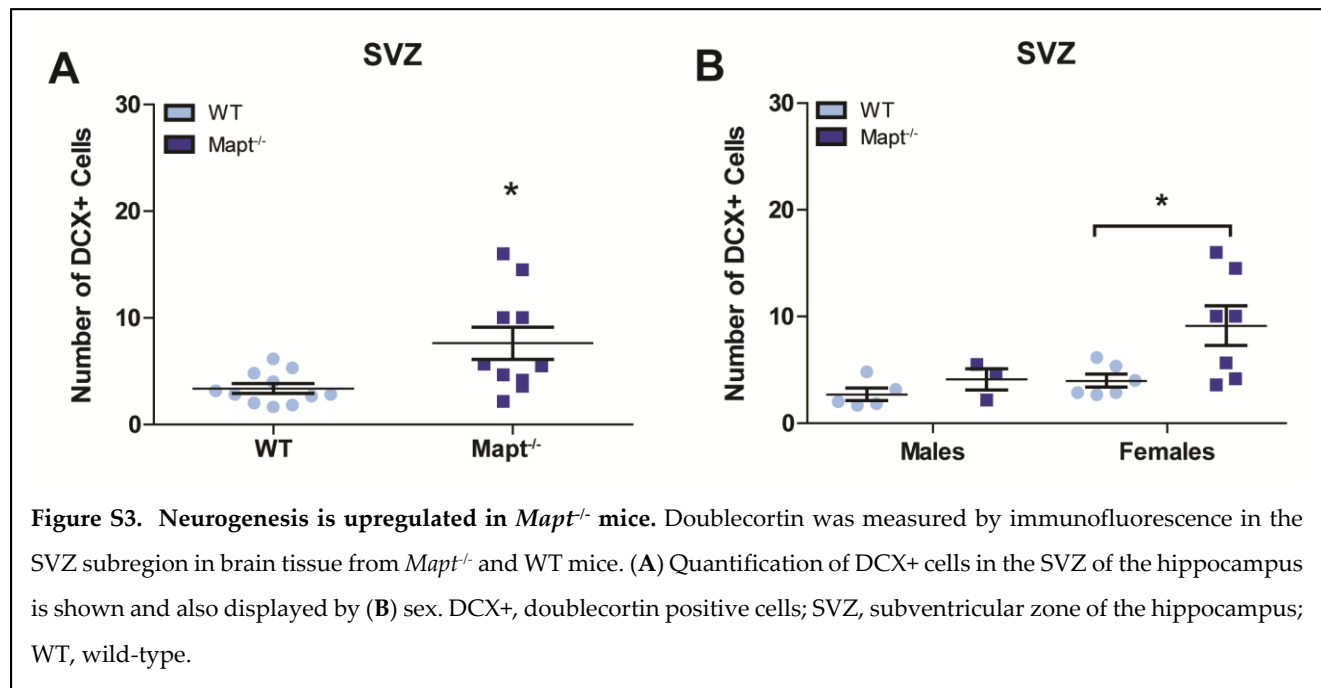

| Table 1. Top proteins associated to neurotogenesis in the anterior cortex and amygdala. |                                                   |                        |
|-----------------------------------------------------------------------------------------|---------------------------------------------------|------------------------|
| Anterior cortex                                                                         |                                                   |                        |
| ID                                                                                      | Name                                              | Expression Fold Change |
| Rhob                                                                                    | Ras homolog family member b                       | 4.706                  |
| Atcay                                                                                   | ATCAY kinesin light chain interacting caytaxin    | 2.388                  |
| Flna                                                                                    | Filamin A                                         | 2.326                  |
| Slc9a6                                                                                  | Solute carrier family 9 member A6                 | 2.153                  |
| Ppp1r9a                                                                                 | Protein phosphatase 1 regulatory subunit 9A       | 1.97                   |
| App                                                                                     | Amyloid beta precursor                            | 1.762                  |
| Cdk5                                                                                    | Cyclin dependent kinase 5                         | -1.453                 |
| Snap91                                                                                  | Synaptosome associated protein 91                 | -1.51                  |
| Gabrb3                                                                                  | Gamma-aminobutyric acid receptor subunit beta-3   | -1.582                 |
| Gpm6a                                                                                   | Glycoprotein M6A                                  | -1.832                 |
| Cdc42                                                                                   | Cell division cycle 42                            | -1.971                 |
| Amygdala                                                                                |                                                   |                        |
| ID                                                                                      | Name                                              | Expression Fold Change |
| Gja1                                                                                    | Gap junction protein alpha 1                      | 2.168                  |
| Ube3a                                                                                   | Ubiquitin protein ligase E3A                      | 1.875                  |
| Strn                                                                                    | Striatin                                          | 1.787                  |
| Rapgef4                                                                                 | Rap guanine nucleotide exchange factor 4          | 1.769                  |
| Caprin1                                                                                 | Cell cycle associated protein 1                   | 1.737                  |
| Lamb2                                                                                   | Laminin subunit beta 2                            | -3.257                 |
| Gap43                                                                                   | Growth associated protein 43                      | -3.275                 |
| Basp1                                                                                   | Brain abundant membrane attached signal protein 1 | -3.444                 |
| Rims1                                                                                   | Regulated synaptic membrane exocytosis 1          | -4.667                 |
| Fnbp1                                                                                   | Formin binding protein 1                          | -4.733                 |

**Table S1.** Neural tissue homogenates from the amygdala (AMYG) and frontal cortex (FCX) of 14-month-old Mapt<sup>-/-</sup> and WT mice (n = 3 per genotype) were analyzed by proteomic mass spectrometry. Data includes top proteins associated to neuritogenesis in these brain regions.
